# Supplementary material
Source: HighWire-hosted journal article supplement (https://bmjopen.bmj.com/content/12/7/e062617)
Supplement: inline-supplementary-material-1 [file inline-supplementary-material-1.pdf]

**Table S1.** Descriptive statistics of hematologic tests in healthy 20-25 years Korean soldiers.

| All                                         | XN series (XN 1000 and XN 3000) |                |              | ADVIA 2120i |                |              |
|---------------------------------------------|---------------------------------|----------------|--------------|-------------|----------------|--------------|
|                                             | n                               | mean (SD)      | median (IQR) | n           | mean (SD)      | median (IQR) |
| Hb (g/dL)                                   | 181,217                         | 15.53 (0.88)   | 15.5 (1.1)   | 61,322      | 15.54 (0.9)    | 15.6 (1.2)   |
| Hct (%)                                     | 181,214                         | 45.71 (2.49)   | 45.7 (3.2)   | 61,322      | 46.31 (2.74)   | 46.3 (3.6)   |
| RBC (10 <sup>6</sup> /uL)                   | 181,214                         | 5.19 (0.32)    | 5.19 (0.42)  | 61,322      | 5.08 (0.32)    | 5.08 (0.42)  |
| WBC (10 <sup>3</sup> /uL)                   | 182,215                         | 6.98 (1.73)    | 6.75 (2.19)  | 61,322      | 6.76 (1.59)    | 6.55 (1.97)  |
| PLT (10 <sup>3</sup> /uL)                   | 182,212                         | 249.86 (46.21) | 246 (60)     | 61,321      | 252.82 (49.18) | 249 (64)     |
| Obese<br>(BMI ≥25.0 kg/m <sup>2</sup> )     | XN series (XN 1000 and XN 3000) |                |              | ADVIA 2120i |                |              |
|                                             | n                               | mean (SD)      | median (IQR) | n           | mean (SD)      | median (IQR) |
| Hb (g/dL)                                   | 49,189                          | 15.65 (0.87)   | 15.7 (1.1)   | 16,656      | 15.66 (0.91)   | 15.7 (1.2)   |
| Hct (%)                                     | 49,188                          | 46.04 (2.48)   | 46 (3.3)     | 16,656      | 46.67 (2.73)   | 46.7 (3.7)   |
| RBC (10 <sup>6</sup> /uL)                   | 49,188                          | 5.25 (0.32)    | 5.25 (0.43)  | 16,656      | 5.13 (0.32)    | 5.13 (0.43)  |
| WBC (10 <sup>3</sup> /uL)                   | 49,188                          | 7.31 (1.75)    | 7.08 (2.23)  | 16,656      | 7.03 (1.62)    | 6.8 (2.00)   |
| PLT (10 <sup>3</sup> /uL)                   | 49,185                          | 257.99 (47.55) | 254 (62)     | 16,656      | 260.17 (50.85) | 256 (66.0)   |
| Non-obese<br>(BMI <25.0 kg/m <sup>2</sup> ) | XN series (XN 1000 and XN 3000) |                |              | ADVIA 2120i |                |              |
|                                             | n                               | mean (SD)      | median (IQR) | n           | mean (SD)      | median (IQR) |
| Hb (g/dL)                                   | 132,028                         | 15.48 (0.88)   | 15.5 (1.2)   | 44,666      | 15.5 (0.9)     | 15.5 (1.2)   |
| Hct (%)                                     | 132,026                         | 45.59 (2.48)   | 45.6 (3.3)   | 44,666      | 46.18 (2.73)   | 46.2 (3.6)   |
| RBC (10 <sup>6</sup> /uL)                   | 130,027                         | 5.17 (0.32)    | 5.16 (0.42)  | 44,666      | 5.06 (0.31)    | 5.06 (0.42)  |
| WBC (10 <sup>3</sup> /uL)                   | 130,027                         | 6.86 (1.71)    | 6.63 (2.14)  | 44,666      | 6.67 (1.56)    | 6.46 (1.91)  |
| PLT (10 <sup>3</sup> /uL)                   | 130,027                         | 246.82 (45.33) | 243 (58)     | 44,665      | 250.08 (48.25) | 246 (62)     |

SD = standard deviation, IQR = inter-quartile range, RI = reference interval, Hb = hemoglobin, Hct = hematocrit, RBC = red blood cell, WBC = white blood cell, PLT = platelet, BMI = body mass index.

**Table S2.** Descriptive statistics of chemistry tests in healthy 20-25 years Korean soldiers.

| <b>All soldiers</b>                                           | <b>n</b> | <b>mean (SD)</b> | <b>median (IQR)</b> |
|---------------------------------------------------------------|----------|------------------|---------------------|
| Creatinine (mg/dL)                                            | 242,532  | 0.94 (0.13)      | 0.94 (0.17)         |
| AST (IU/L)                                                    | 242,541  | 24.73 (19.02)    | 22 (7)              |
| ALT (IU/L)                                                    | 242,522  | 22.85 (19.7)     | 18 (11)             |
| GGT (IU/L)                                                    | 242,536  | 19.79 (12.8)     | 17 (8.8)            |
| Total cholesterol (mg/dL)                                     | 242,363  | 172.08 (29.46)   | 169.6 (37.1)        |
| Triglyceride (mg/dL)                                          | 234,750  | 87.81 (56.83)    | 73 (47)             |
| HDL cholesterol (mg/dL)                                       | 234,870  | 53.94 (10.16)    | 53 (13)             |
| LDL cholesterol (mg/dL)                                       | 234,869  | 104.36 (24.65)   | 102 (32)            |
| Glucose, fasting (mg/dL)                                      | 242,545  | 91.16 (8.29)     | 91 (10)             |
| <b>Obese<br/>(BMI <math>\geq</math>25.0 kg/m<sup>2</sup>)</b> | <b>n</b> | <b>mean (SD)</b> | <b>median (IQR)</b> |
| Creatinine (mg/dL)                                            | 65,841   | 0.93 (0.14)      | 0.93 (0.17)         |
| AST (IU/L)                                                    | 65,845   | 26.94 (18.13)    | 23 (8)              |
| ALT (IU/L)                                                    | 65,840   | 31.31 (28.9)     | 23 (17)             |
| GGT (IU/L)                                                    | 65,843   | 25.04 (18.27)    | 20 (13)             |
| Total cholesterol (mg/dL)                                     | 65,771   | 179.5 (31.96)    | 177 (41.8)          |
| Triglyceride (mg/dL)                                          | 64,098   | 109.6 (76.54)    | 89 (67)             |
| HDL cholesterol (mg/dL)                                       | 64,126   | 50.61 (9.6)      | 50 (12)             |
| LDL cholesterol (mg/dL)                                       | 64,124   | 112.43 (26.53)   | 110 (34)            |
| Glucose, fasting (mg/dL)                                      | 65,843   | 92.19 (8.56)     | 92 (10)             |
| <b>Non-obese<br/>(BMI &lt;25.0 kg/m<sup>2</sup>)</b>          | <b>n</b> | <b>mean (SD)</b> | <b>median (IQR)</b> |
| Creatinine (mg/dL)                                            | 176,691  | 0.94 (0.13)      | 0.94 (0.17)         |
| AST (IU/L)                                                    | 176,696  | 23.91 (19.27)    | 21 (6)              |
| ALT (IU/L)                                                    | 176,682  | 19.7 (13.59)     | 17 (9)              |
| GGT (IU/L)                                                    | 176,693  | 17.83 (9.3)      | 16 (7)              |
| Total cholesterol (mg/dL)                                     | 176,592  | 169.31 (27.97)   | 167 (36)            |
| Triglyceride (mg/dL)                                          | 170,652  | 79.62 (44.69)    | 68.4 (40)           |
| HDL cholesterol (mg/dL)                                       | 170,744  | 55.19 (10.08)    | 54 (13)             |
| LDL cholesterol (mg/dL)                                       | 170,745  | 101.33 (23.18)   | 99 (29.8)           |
| Glucose, fasting (mg/dL)                                      | 176,702  | 90.77 (8.16)     | 91 (10)             |

SD = standard deviation, IQR = inter-quartile range, RI = reference interval, AST = aspartate aminotransferase, ALT = alanine aminotransferase, GGT = gamma glutamyl transferase, HDL = high density lipoprotein, and LDL = low density lipoprotein.
